# Maternal Prepregnancy Body Mass Index and Gestational Weight Gain on Offspring Overweight in Early Infancy

Nan Li<sup>1,2</sup>, Enqing Liu<sup>1</sup>, Jia Guo<sup>1</sup>, Lei Pan<sup>1</sup>, Baojuan Li<sup>1</sup>, Ping Wang<sup>1</sup>, Jin Liu<sup>1</sup>, Yue Wang<sup>1</sup>, Gongshu Liu<sup>1</sup>, Gang Hu<sup>2\*</sup>

**1** Tianjin Women's and Children's Health Center, Tianjin, China, **2** Chronic Disease Epidemiology Laboratory, Pennington Biomedical Research Center, Baton Rouge, Louisiana, United States of America

## Abstract

**Objective:** The aim of the present study was to evaluate the association of maternal prepregnancy body mass index (BMI) and gestational weight gain (GWG) with anthropometry in the offspring from birth to 12 months old in Tianjin, China.

**Methods:** Between 2009 and 2011, health care records of 38,539 pregnant women had been collected, and their children had been measured body weight and length at birth, 3, 6, 9 and 12 months of age. The independent and joint associations of pre-pregnancy BMI and GWG based on the Institute of Medicine (IOM) guidelines with anthropometry in the offspring were examined using General Linear Model and Logistic Regression.

**Results:** Prepregnancy BMI and maternal GWG were positively associated with Z-scores for birth weight-for-gestational age, birth length-for-gestational age, and birth weight-for-length. Infants born to mothers with excessive GWG had the greatest changes in Z-scores for weight-for-age from birth to Month 3, and from Month 6 to Month 12, and the greatest changes in Z-scores for length-for-age from birth to months 3 and 12 compared with infants born to mothers with adequate GWG. Excessive GWG was associated with an increased risk of offspring overweight or obesity at 12 months old in all BMI categories except underweight.

**Conclusions:** Maternal prepregnancy overweight/obesity and excessive GWG were associated with greater weight gain and length gain of offspring in early infancy. Excessive GWG was associated with increased infancy overweight and obesity risk.

**Citation:** Li N, Liu E, Guo J, Pan L, Li B, et al. (2013) Maternal Prepregnancy Body Mass Index and Gestational Weight Gain on Offspring Overweight in Early Infancy. PLoS ONE 8(10): e77809. doi:10.1371/journal.pone.0077809

**Editor:** Jung Eun Lee, Sookmyung Women's University, Korea, Republic Of

**Received:** April 29, 2013; **Accepted:** September 4, 2013; **Published:** October 11, 2013

**Copyright:** © 2013 Li et al. This is an open-access article distributed under the terms of the Creative Commons Attribution License, which permits unrestricted use, distribution, and reproduction in any medium, provided the original author and source are credited.

**Funding:** All phases of this study were supported by Tianjin Women's and Children's Health Center. The funders had no role in study design, data collection and analysis, decision to publish, or preparation of the manuscript.

**Competing interests:** The authors have declared that no competing interests exist.

\* E-mail: gang.hu@pbrc.edu

## Introduction

Improvements of maternal, fetal, and child health are key public health goals. Childhood obesity is a global problem. Worldwide, the childhood obesity prevalence in 2010 is 6.7%, and 70% of obese adolescents become obese adults [1]. Developing effective prevention and intervention programs for the children at formative pre-school years (2-6 years old) might be an important step in combating the childhood obesity epidemic. Some studies have indicated that higher birth weight may be a risk factor of obesity in the late life [2-4].

In recent years, maternal prepregnancy body mass index (BMI) has increased among the childbearing age women in developed countries [5]. The Pregnancy Nutrition Surveillance System (PNSS) reported that approximately one-half of women gained more weight than recommended by the Institute of

Medicine (IOM) guidelines. In the 2009 PNSS, 21.2% of women gained less weight than recommended during pregnancy, 30.6% gained the recommended amount of weight, and 48.2% gained more weight than recommended [6]. Moreover, women who are overweight or obese at the start of pregnancy or gain weight excessively or inadequately during pregnancy are at increased risk of poor maternal and child health outcomes. Several recent studies reported that prepregnancy BMI was positively associated with infant birth weight [7,8], and excessive gestational weight gain (GWG) was associated with many pregnancy complications such as preterm birth, cesarean delivery, and large for gestational age neonates [9-11]. The Danish National Birth Cohort found that excess weight gain in pregnancy increased risks of cesarean delivery and large for gestational age infant [8]. Another US longitudinal cohort study of children 2 to 12 years of age (the

National Longitudinal Survey of Youth 1979, NLSY79) found that maternal weight gain during pregnancy  $\geq 20.43$  kg were associated with an increased risk of early onset overweight but not late onset overweight [12].

In 2009, the IOM published new recommendations for weight gain during pregnancy [13]. This recommendation varying by pre-pregnancy BMI based on the World Health Organization (WHO) categories was not only suitable for developed countries, but also for Chinese women [14]. It has been shown that being overweight or obese and having a high weight gain, as well as being underweight and having a low weight gain during pregnancy, were associated with increased risks for adverse pregnancy outcomes in women from China and other countries as well [15]. Many studies have suggested that children who gain weight fast in infancy predict a later risk for obesity in childhood and adulthood [16,17]. Two recent researches using the Pregnancy, Infection, and Nutrition Study (2001–2005) reported that infants of women with excessive weight gains had higher weight-for-age, length-for-age and weight-for-length Z scores between birth and 3 years, compared with infants of women with adequate weight gain [18,19]. However, very few studies have examined whether maternal weight gain during pregnancy also predicts weight gain of their children in early infancy. Therefore, the aim of the present study was to evaluate the association of maternal gestational weight gain with anthropometry in the offspring from birth to 12 months old in Tianjin, China.

## Methods

### Study Sample

Tianjin is the fourth largest city with over 12.9 million residents in northern China, and 4.3 million residents live in six central urban districts. Tianjin consists of 16 county-level administrative areas, including six central urban districts, one new urban district, and nine counties that govern towns and rural areas. The prenatal care and children health care in six central urban districts are a routine of a three-tier care system consisting of approximately 65 primary hospitals, 6 district-level Women's and Children's Health Centers (also including secondary hospitals), and a city-level (Tianjin) Women's and Children's Health Center (also including tertiary hospitals). In Tianjin, all pregnant women are registered at the primary hospitals, and in the 32<sup>nd</sup> gestational week, they are referred to a secondary hospital or a tertiary hospital for management till delivery. All children are given the health examinations in the newborns, postnatal period, infancy, and at preschool. Tianjin Women and Children's Health Centre is the leader of the 3-tier care system and responsible for organization, co-ordination and implementation of women and child health care, research and promotion projects.

Health care records for both pregnant women and their children have been collected and available in electronic form since 2009 [20]. Pregnant Women Health Records start within the first 12 weeks of pregnancy, and include general information (age, occupation, education, date of first visit, numbers of pregnancy/infants, last menstrual period, expected delivery date, smoking habits, etc), history of diseases, family

history of diseases, clinical measurements (height, weight, blood pressure, gynaecological examinations, ultrasonography, gestational diabetes (GDM) screening test and other lab tests), complications during pregnancy, pregnancy outcomes (delivery modes, labor complications, etc), and postnatal period examinations (<42 days after delivery). Children Health Records include information from newborns (date of birth, sex, gestational week of birth, birth weight, birth recumbent length, Apgar score, etc), postnatal period (<42 days after birth) (names of the child and his/her parents, family history of diseases, feeding modalities, weight, and recumbent length), infancy (health examinations at each three months during the first 12 months and each six months during 1-3 years), and preschool (health examinations at each year during 3-7 years). The information of feeding modalities (exclusive breast feeding, mixed breast and formula feeding, weaned from breast feeding, and exclusive formula feeding) during the first 12 months, and the measurements of recumbent length/height, weight, blood hemoglobin, and blood pressure (from 3 years old) are collected and available in each health examination. We collected 66,285 records of both mothers and their infants who were born between June 2009 and May 2011. The present study included 38,539 mother-child pairs (60.1%) with all information and clinical measurements after excluding mothers missing the first weight measurement within the first 12 weeks of pregnancy (8,701), multiple births ( $n=1,496$ ), stillbirth ( $n=143$ ), premature infants (gestational age <37 weeks,  $n=1,299$ ), and mother-child pairs missing any variables required for this analysis ( $n=16,107$ ). Compared with children excluded in the present study, the children included in the present analysis had similar age (12.2 vs. 12.2 months old), were less males (51.5% vs. 53.6%), and their mothers were younger (27.7 vs. 27.8 years old). Of 38,539 mother-child pairs, the rates of child health examination at months 3, 6, 9, and 12 were 88.4%, 90.7%, 94.5% and 98.3%, respectively. The study and analysis plan were approved by Tianjin Women's and Children's Health Center Institutional Review Board. Tianjin Women's and Children's Health Center has agreed to waive the need for written informed consent from all participants involved in our study because we use the electronic dataset from health care records.

### Measurements

Mothers' anthropometric data were collected during the pregnancy. Weight and height were measured in light clothing and no shoes using a beambalance scale (RGZ-120, Jiangsu Suhong Medical Instruments Co., China). Blood pressure was measured using a standardized mercury sphygmomanometer (XJ11D, Shanghai Medical Instruments Co., China). Children's weight and length were measured at birth, 3 months (<4 months), 6 months ( $\geq 4$  and <7 months), 9 months ( $\geq 7$  and <10 months), and 12 months ( $\geq 10$  and <13 months). Weight was measured to the nearest 0.01 kg using a digital scale (TCS-60, Tianjin Weighing Apparatus Co., China). Length was measured to the nearest 0.1 cm using a recumbent length stadiometer (YSC-2, Beijing Guowangxingda, China). We have done a validity study to compare the electronic data of measurements of birth weight and hospitals' measurements of birth weight

among 454 children in six major hospitals. The correlation between two measurements is 0.991. We have also done a validity study to compare the electronic data of measurements of height and weight with the same visit's measurements of height and weight by trained health workers among 200 pregnancy women and 160 children aged  $\leq 2$  years in four different local health centers. The correlations between electronic data and measurement data for body weight are 0.998 for pregnancy women and 0.999 for children, and for height/recumbent length are 0.997 for pregnancy women and 0.999 for children.

Body mass index (BMI) was calculated by dividing weight in kilograms by the square of height in meters. Prepregnancy BMI was categorized as underweight (BMI  $< 18.5$  kg/m<sup>2</sup>), normal-weight ( $18.5$  kg/m<sup>2</sup>  $\leq$  BMI  $< 24$  kg/m<sup>2</sup>), overweight ( $24$  kg/m<sup>2</sup>  $\leq$  BMI  $< 28$  kg/m<sup>2</sup>), or obese (BMI  $\geq 28$  kg/m<sup>2</sup>) using the standard of Working Group on Obesity in China [21]. The Chinese BMI classification standard is used due to the best sensitivity and specificity for identifying risk factors including hypertension, type 2 diabetes, and dyslipidemia in the Chinese population [22–24]. The prepregnancy BMI was calculated using the weight and height recorded at the first prenatal visit within the first 12 weeks of pregnancy. The average (range) gestational weeks at the first weight measurement were 10.4 (2.0–12.9) weeks. The previous study reported that there was a high correlation between self-reported prepregnancy weight and weight recorded at the first visit [25]. Weight gain of mothers during pregnancy was calculated as the difference between prepregnancy weight and delivery weight (end of pregnancy weight). Adequacy of GWG was defined according to the Chinese maternal prepregnancy BMI classification standard and the 2009 IOM GWG recommendations (1): 12.5–18 kg (BMI  $< 18.5$  kg/m<sup>2</sup>), 11.5–16 kg (BMI 18.5– 23.9 kg/m<sup>2</sup>), 7–11.5 kg (BMI 24.0–27.9 kg/m<sup>2</sup>), and 5–9 kg (BMI  $> 28$  kg/m<sup>2</sup>) [13]. Inadequacy of GWG was defined as below adequacy of GWG and excessive of GWG was defined as above adequacy of GWG according to the Chinese pre-pregnancy BMI classification standard and the 2009 IOM GWG recommendations. We use the translation of U.S. IOM GWG recommendations because no official recommendations exist in China.

We calculated Z scores (standard deviation [SD] scores) independent of sex and age – that is, measurement minus population mean/population SD – in each infant for weight, length, and weight for length and BMI at months 3, 6, 9, and 12 based on the standards for the WHO growth reference [26]. Z scores for birth weight for gestational age, birth length for gestational age, birth weight for length for gestational age, and birth BMI for gestational age were calculated using our own study population means and standard deviations. Since the present study samples were the infants aged under 2 years, BMI normative values are not available [27]. We used the WHO weight for length growth reference. Overweight was defined as a weight for length above the 85th percentile ( $\geq 1.035$  Z score), and obesity was defined as a weight for length above the 95th percentile ( $\geq 1.645$  Z score) [26].

## Statistical analyses

The general characteristics of both mothers and children according to different categories of maternal GWG were compared using General Linear Model and chi-square test. General Linear Models were used to compare the differences in: 1) Z scores for birth body weight, birth body length and birth weight for length; 2) Z scores for body weight, body length and weight for length at months 3, 6, 9, and 12; 3) changes in Z scores for body weight for age, body length for age and weight for length from birth to Month 12 and from Month 6 to Months 12; and 4) changes in Z scores for body weight for age, body length for age and weight for length for each three months, according to different categories of maternal GWG. A repeated measures analysis of variance (General Linear Model) and Least Significant Difference (LSD) post hoc test were used to compare the mean values of Z scores among children who were measured weight and length at each three months during the first year of life ( $n=25,842$ ) according to maternal prepregnancy BMI and GWG categories. We included 2 models in the analyses: model 1 adjusted for maternal age, maternal height, maternal gestational diabetes (GDM), maternal education, smoking, family income ( $< 2000$ ,  $2000$ – $3000$ ,  $> 3000$  yuan/month) (US\$1=six point one yuan), maternal occupation, and mode of infant feeding; model 2 additionally adjusted for birth variables for gestational age Z score. GDM was diagnosed on the basis of a 50-g 1-hour glucose challenge test (GCT) and a 75-g 2-hour oral glucose tolerance test (OGTT) using WHO criteria [28]. Logistic regression was used to assess the single and joint associations of maternal prepregnancy BMI and GWG with the risk of infant overweight or obesity. The significance of the trend over different categories of maternal prepregnancy BMI and GWG categories was tested in the same models by giving an ordinal numeric value for each dummy variable. The criterion for statistical significance was  $< 0.05$  (for two-sided tests). All statistical analyses were performed with PASW for Windows, version 20.0 (Statistics 20, SPSS, IBM, USA)

## Results

The general characteristics of both mothers and children according to maternal GWG categories are presented in Table 1. Mothers who were overweight or obese before pregnancy were older, and reported a lower education level and a lower family income level compared with mothers who were normal weight before pregnancy. Compared with mothers with adequate GWG, mothers with excessive GWG were younger, had a higher prepregnancy BMI, and reported a lower education level, and mothers with inadequate GWG reported a lower education level and a lower family income level.

We compared the mean values of Z scores for body weight, body length and weight for length among children from birth to months 3, 6, 9, and 12 according to maternal prepregnancy BMI and GWG categories (Table S1). Maternal prepregnancy BMI and GWG were positively associated with Z scores for birth weight for gestational age, birth length for gestational age, and birth weight for length. Infants born to mothers with prepregnancy obesity or excessive GWG had greater mean

**Table 1.** Characteristics of study participants among 38 539 mother-infant pairs according to gestational weight gain categories in Tianjin, China.

|                                     | Pre-pregnancy BMI (kg/m <sup>2</sup> ) |             |             |             | P for trend | IOM categories § |             |             | P for trend |
|-------------------------------------|----------------------------------------|-------------|-------------|-------------|-------------|------------------|-------------|-------------|-------------|
|                                     | <18.5                                  | 18.5-23.99  | 24.0-27.99  | ≥28         |             | Inadequate       | Adequate    | Excessive   |             |
| No. of subjects                     | 4 255                                  | 24 678      | 7 186       | 2 420       |             | 3 793            | 12 645      | 22 101      |             |
| <b>Maternal characteristics</b>     |                                        |             |             |             |             |                  |             |             |             |
| Gestational weight gain, kg         | 16.5 (5.1)                             | 17.7 (5.5)  | 18.0 (6.2)  | 17.2 (6.9)  | <0.001      | 9.4 (1.9)        | 14.3 (1.8)  | 20.9 (5.1)  | <0.001      |
| Maternal age before pregnancy, y    | 26.7 (2.9)                             | 27.6 (3.2)  | 28.1 (3.5)  | 28.1 (3.6)  | <0.001      | 27.8 (3.7)       | 27.8 (3.3)  | 27.5 (3.2)  | <0.001      |
| Gestational age at delivery, wk     | 39.2 (1.1)                             | 39.3 (1.1)  | 39.2 (1.2)  | 38.1 (1.2)  | <0.001      | 39.2 (1.1)       | 39.2 (1.1)  | 39.3 (1.1)  | <0.001      |
| Prepregnancy BMI, kg/m <sup>2</sup> | 17.6 (0.8)                             | 21.1 (1.5)  | 25.6 (1.1)  | 30.6 (2.4)  | <0.001      | 20.5 (2.4)       | 20.9 (2.5)  | 23.2 (3.7)  | <0.001      |
| Mother's education, %               |                                        |             |             |             | <0.001      |                  |             |             | <0.001      |
| University and above                | 44.8                                   | 48.1        | 41.4        | 29.3        |             | 42.8             | 49.0        | 43.7        |             |
| Junior college                      | 28.5                                   | 26.8        | 27.8        | 27.2        |             | 25.5             | 26.1        | 28.1        |             |
| High school and under               | 26.7                                   | 25.1        | 30.8        | 43.5        |             | 31.7             | 24.9        | 28.2        |             |
| Family income, yuan/month #, %      |                                        |             |             |             | <0.001      |                  |             |             | <0.001      |
| ≥3000                               | 55.9                                   | 58.3        | 52.3        | 43.6        |             | 51.6             | 57.5        | 55.9        |             |
| 2000-2999                           | 23.7                                   | 21.7        | 25.1        | 25.3        |             | 23.6             | 22.4        | 22.9        |             |
| <2000                               | 20.4                                   | 20.0        | 22.6        | 31.1        |             | 24.8             | 20.1        | 21.2        |             |
| Smoking during pregnancy, %         | 1.2                                    | 1.0         | 1.2         | 1.9         | <0.001      | 0.9              | 0.8         | 1.4         | <0.001      |
| Passive smoking, %                  | 48.3                                   | 48.1        | 50.2        | 54.5        | <0.001      | 46.5             | 46.4        | 50.7        | <0.001      |
| Occupation of mother, %             |                                        |             |             |             | <0.001      |                  |             |             | <0.001      |
| Farmers and workers                 | 15.9                                   | 16.7        | 19.9        | 25.1        |             | 18.2             | 16.5        | 18.3        |             |
| Office workers                      | 42.5                                   | 42.7        | 38.9        | 32.2        |             | 40.2             | 42.7        | 40.8        |             |
| Service professional workers        | 19.1                                   | 21.0        | 19.6        | 16.3        |             | 18.6             | 21.3        | 19.9        |             |
| Unemployed persons                  | 10.1                                   | 8.4         | 9.5         | 12.6        |             | 10.5             | 8.4         | 9.2         |             |
| Other                               | 12.4                                   | 11.2        | 12.1        | 13.8        |             | 12.5             | 11.1        | 11.8        |             |
| <b>Child characteristics</b>        |                                        |             |             |             | 0.159       |                  |             |             | 0.106       |
| Boy, %                              | 50.0                                   | 51.6        | 51.8        | 52.4        |             | 52.2             | 50.8        | 51.8        |             |
| Mode of infant feeding, %           |                                        |             |             |             | <0.001      |                  |             |             | <0.001      |
| Exclusive breast-feeding            | 15.1                                   | 15.3        | 14.0        | 11.3        |             | 14.9             | 16.0        | 14.1        |             |
| Mixed breast and formula            | 68.8                                   | 70.8        | 70.8        | 68.5        |             | 70.5             | 70.2        | 70.5        |             |
| Weaned from breast-feeding          | 14.1                                   | 12.1        | 12.6        | 17.3        |             | 12.7             | 12.0        | 13.2        |             |
| Exclusive formula feeding           | 2.0                                    | 1.8         | 2.6         | 2.9         |             | 1.9              | 1.8         | 2.2         |             |
| <b>Weight, kg</b>                   |                                        |             |             |             |             |                  |             |             |             |
| Birth, gram                         | 3265 (388)                             | 3411 (413)  | 3515 (453)  | 3594 (489)  | <0.001      | 3275 (399)       | 3343 (398)  | 3499 (438)  | <0.001      |
| 3 month                             | 6.74 (0.77)                            | 6.96 (0.80) | 7.04 (0.81) | 7.07 (0.84) | <0.001      | 6.82 (0.79)      | 6.88 (0.79) | 7.02 (0.81) | <0.001      |
| 6 month                             | 8.42 (0.96)                            | 8.69 (1.00) | 8.82 (1.04) | 8.90 (1.07) | <0.001      | 8.54 (0.99)      | 8.60 (0.99) | 8.77 (1.03) | <0.001      |
| 9 month                             | 9.39 (1.03)                            | 9.70 (1.10) | 9.87 (1.15) | 9.94 (1.18) | <0.001      | 9.52 (1.09)      | 9.60 (1.07) | 9.81 (1.13) | <0.001      |
| 12 month                            | 10.2 (1.1)                             | 10.5 (1.1)  | 10.7 (1.2)  | 10.8 (1.3)  | <0.001      | 10.3 (1.1)       | 10.4 (1.1)  | 10.6 (1.2)  | <0.001      |
| <b>Length, cm</b>                   |                                        |             |             |             |             |                  |             |             |             |
| Birth                               | 50.0 (1.4)                             | 50.3 (1.5)  | 50.5 (1.5)  | 50.6 (1.6)  | <0.001      | 50.0 (1.4)       | 50.1 (1.4)  | 50.5 (1.5)  | <0.001      |
| 3 month                             | 62.6 (2.2)                             | 63.0 (2.2)  | 63.0 (2.3)  | 63.0 (2.3)  | <0.001      | 62.6 (2.2)       | 62.8 (2.2)  | 63.1 (2.2)  | <0.001      |
| 6 month                             | 68.8 (2.4)                             | 69.2 (2.4)  | 69.3 (2.5)  | 69.2 (2.5)  | <0.001      | 68.8 (2.5)       | 69.0 (2.4)  | 69.3 (2.4)  | <0.001      |
| 9 month                             | 73.0 (2.5)                             | 73.4 (2.5)  | 73.6 (2.6)  | 73.5 (2.6)  | <0.001      | 73.1 (2.5)       | 73.3 (2.5)  | 73.6 (2.6)  | <0.001      |
| 12 month                            | 76.6 (2.6)                             | 77.0 (2.7)  | 77.2 (2.7)  | 77.2 (2.7)  | <0.001      | 76.7 (2.6)       | 76.8 (2.6)  | 77.2 (2.7)  | <0.001      |
| Overweight at age 12 months*, %     | 29.2                                   | 38.2        | 44.5        | 48.4        | <0.001      | 33.1             | 35.7        | 41.9        | <0.001      |
| Obesity at age 12 months*, %        | 12.3                                   | 18.6        | 23.5        | 27.1        | <0.001      | 15.2             | 17.0        | 21.4        | <0.001      |

BMI, body mass index.

# US\$1=six point one yuan

\* Overweight was defined as weight-for-length ≥85th percentile (≥1.035 Z score); Obesity was defined as weight-for-length ≥95th percentile (≥1.645 Z score); Sex-specific weight-for-length percentiles were based on WHO growth reference (World Health Organization, 2006).

§ IOM categories: Inadequate (1): <12.5 kg (pre-pregnancy BMI <18.5 kg/m<sup>2</sup>), <11.5 kg (BMI 18.5- 23.9 kg/m<sup>2</sup>), <7 kg (BMI 24.0–27.9 kg/m<sup>2</sup>), and <5 kg (BMI >28 kg/m<sup>2</sup>); Adequate (1): 12.5–18 kg (BMI <18.5 kg/m<sup>2</sup>), 11.5–16 kg (BMI 18.5- 23.9 kg/m<sup>2</sup>), 7–11.5 kg (BMI 24.0–27.9 kg/m<sup>2</sup>), and 5–9 kg (BMI >28 kg/m<sup>2</sup>); Excessive (1): >18 kg (BMI <18.5 kg/m<sup>2</sup>), >16 kg (BMI 18.5- 23.9 kg/m<sup>2</sup>), >11.5 kg (BMI 24.0–27.9 kg/m<sup>2</sup>), and >9 kg (BMI >28 kg/m<sup>2</sup>), according to the Chinese maternal pre-pregnancy BMI classification standard and the 2009 IOM GWG recommendations.

doi: 10.1371/journal.pone.0077809.t001

**Table 2.** Comparison of Z scores for body weight, body length, and weight for length during the first year of life by the repeated measures.

|                           | Pre-pregnancy BMI (kg/m <sup>2</sup> ) |             |             |             | P for trend | IOM categories*# |             |             | P for trend |
|---------------------------|----------------------------------------|-------------|-------------|-------------|-------------|------------------|-------------|-------------|-------------|
|                           | <18.5                                  | 18.5-23.99  | 24.0-27.99  | ≥28.0       |             | Inadequate       | Adequate    | Excessive   |             |
| No. of subjects           | 2 510                                  | 14 367      | 4 070       | 1 288       |             | 2 050            | 7 268       | 12 917      |             |
| Weight-for-age z-score    | 0.45 (0.02)                            | 0.74 (0.01) | 0.88 (0.01) | 0.99 (0.02) | <0.001      | 0.61 (0.02)      | 0.69 (0.01) | 0.80 (0.01) | <0.001      |
| Length-for-age z-score    | 0.52 (0.02)                            | 0.69 (0.01) | 0.76 (0.01) | 0.80 (0.02) | <0.001      | 0.60 (0.02)      | 0.65 (0.01) | 0.73 (0.01) | <0.001      |
| Weight-for-length z-score | 0.25 (0.02)                            | 0.53 (0.01) | 0.67 (0.01) | 0.79 (0.02) | <0.001      | 0.43 (0.02)      | 0.49 (0.01) | 0.59 (0.01) | <0.001      |

Data are means (SE).

Adjusted for maternal age, maternal height, maternal gestational diabetes, maternal education, smoking, family income, maternal occupation, and mode of infant feeding.

\* Adjusted also for prepregnancy BMI.

# IOM categories: Inadequate (1): <12.5 kg (pre-pregnancy BMI <18.5 kg/m<sup>2</sup>), <11.5 kg (BMI 18.5- 23.9 kg/m<sup>2</sup>), <7 kg (BMI 24.0–27.9 kg/m<sup>2</sup>), and <5 kg (BMI >28 kg/m<sup>2</sup>); Adequate (1): 12.5–18 kg (BMI <18.5 kg/m<sup>2</sup>), 11.5–16 kg (BMI 18.5- 23.9 kg/m<sup>2</sup>), 7–11.5 kg (BMI 24.0–27.9 kg/m<sup>2</sup>), and 5–9 kg (BMI >28 kg/m<sup>2</sup>); Excessive (1): >18 kg (BMI <18.5 kg/m<sup>2</sup>), >16 kg (BMI 18.5- 23.9 kg/m<sup>2</sup>), >11.5 kg (BMI 24.0–27.9 kg/m<sup>2</sup>), and >9 kg (BMI >28 kg/m<sup>2</sup>), according to the Chinese maternal pre-pregnancy BMI classification standard and the 2009 IOM GWG recommendations.

doi: 10.1371/journal.pone.0077809.t002

values of Z scores for birth weight for gestational age, birth length for gestational age and birth weight for length, and greater mean values of Z scores for weight for age and length for age at month 3, 6, 9 and 12 compared with other infants born to mothers with prepregnancy normal weight or adequate GWG. The mean values of Z scores for weight for age, length for age, and weight for length in infants born to mothers with prepregnancy overweight or obesity or excessive GWG were significantly higher than those in infants born to mothers with prepregnancy normal weight or adequate GWG, as analyzed by the repeated measures General Linear Model and LSD post hoc test (Table 2 and Table S2).

Table 3 present the changes in Z scores for body weight for age, body length for age, and weight for length among children for each three months from birth to months 12 according to maternal prepregnancy BMI and GWG. After adjustment for maternal age, maternal height, maternal gestational diabetes, maternal education, smoking, family income, maternal occupation, and mode of infant feeding (multivariable model 1), infants born to mothers with prepregnancy overweight and obesity or excessive GWG had the smallest changes in Z scores for weight for age, and length for age from birth to months 3, compared with other infants born to mothers with prepregnancy normal weight or adequate GWG. However, after additional adjustment for Z scores for birth weight for gestational age, birth length for gestational age, birth weight for length, and birth BMI for gestational age in the corresponding analyses (multivariable model 2), infants born to mothers with prepregnancy overweight and obesity or excessive GWG had the greatest changes in Z scores for weight for age and length for age from birth to months 3 compared with other infants born to mothers with prepregnancy normal weight or adequate GWG. From months 3 to 6 and from months 6 to 12, infants born to mothers with prepregnancy overweight and obesity had the greatest changes in Z scores for weight for age and length for age compared with other infants born to mothers with normal weight. From months 6 to 12, infants born to mothers with excessive GWG had the greatest changes in Z scores for

weight for age, and weight for length compared with adequate GWG.

Table 4 showed the relative risks of childhood overweight and obesity at age 12 months stratified by maternal prepregnancy BMI and GWG. After adjustment for all confounding factors, the odd ratio (OR) of childhood overweight or obesity at age 12 months was significantly higher in infants born to mothers with prepregnancy overweight (childhood overweight, OR: 1.30 [95% CI: 1.22-1.38]; childhood obesity, OR: 1.35 [95% CI: 1.25-1.46] ) and obesity (childhood overweight, OR: 1.49 [95% CI: 1.35-1.65]; childhood obesity, OR: 1.63 [95% CI: 1.45-1.84] ) compared with infants born to mothers with normal weight. The higher risk of overweight or obesity at age 12 months was also found among the infants born to mothers with excessive GWG (childhood overweight, OR: 1.29 [95% CI: 1.23-1.36]; childhood obesity, OR: 1.31 [95% CI: 1.23-1.40]) compared with infants born to mothers with adequate GWG. We also analyzed the risk of childhood overweight or obesity according to joint 12 groups of maternal prepregnancy BMI and GWG. When we used infants born to mothers with both prepregnancy normal weight and adequate GWG as the reference, we found that excessive GWG was associated with an increased risk of offspring overweight or obesity at 12 months old in all BMI categories exception for underweight group.

## DISCUSSION

The present study indicated that both maternal prepregnancy overweight/obesity and excessive weight gain during pregnancy were associated with higher birth weight and birth length, and greater weight gain and length gain of their children in the first year of life. Meanwhile, we also found that maternal excessive GWG regardless of prepregnancy BMI was associated with an increased risk of offspring overweight or obesity at 12 months old.

The positive association between maternal excessive GWG and higher birth weight of child was similar to the previous

**Table 3.** Changes in Z scores for body weight, body length and weight for length from birth to months 3, 6, 9, and 12 according to pre-pregnancy BMI and gestational weight gain categories.

|                            | Pre-pregnancy BMI (kg/m <sup>2</sup> ) |              |              |              | P for trend | IOM categories#§ |              |              | P for trend |
|----------------------------|----------------------------------------|--------------|--------------|--------------|-------------|------------------|--------------|--------------|-------------|
|                            | <18.5                                  | 18.5-23.99   | 24.0-27.99   | ≥28.0        |             | Inadequate       | Adequate     | Excessive    |             |
| <b>From months 0 to 3</b>  |                                        |              |              |              |             |                  |              |              |             |
| No. of subjects            | 3 331                                  | 19 161       | 5 371        | 1 696        |             | 2 808            | 9 714        | 17 037       |             |
| Weight-for-age             |                                        |              |              |              |             |                  |              |              |             |
| Model 1*                   | 0.93 (0.02)                            | 0.88 (0.01)  | 0.76 (0.01)  | 0.57 (0.02)  | <0.001      | 0.99 (0.02)      | 0.92 (0.01)  | 0.78 (0.01)  | <0.001      |
| Model 2†                   | 0.72 (0.01)                            | 0.86 (0.01)  | 0.87 (0.01)  | 0.82 (0.02)  | <0.001      | 0.84 (0.02)      | 0.85 (0.01)  | 0.84 (0.01)  | 0.890       |
| Length-for-age             |                                        |              |              |              |             |                  |              |              |             |
| Model 1*                   | 0.97 (0.02)                            | 0.93 (0.01)  | 0.85 (0.02)  | 0.72 (0.03)  | <0.001      | 0.90 (0.02)      | 0.92 (0.01)  | 0.90 (0.01)  | 0.188       |
| Model 2†                   | 0.84 (0.02)                            | 0.92 (0.01)  | 0.91 (0.01)  | 0.87 (0.02)  | <0.001      | 0.82 (0.02)      | 0.88 (0.01)  | 0.93 (0.01)  | <0.001      |
| Weight-for-length          |                                        |              |              |              |             |                  |              |              |             |
| Model 1*                   | 0.50 (0.02)                            | 0.41 (0.01)  | 0.32 (0.02)  | 0.14 (0.03)  | <0.001      | 0.61 (0.02)      | 0.49 (0.01)  | 0.30 (0.01)  | <0.001      |
| Model 2†                   | 0.21 (0.02)                            | 0.39 (0.01)  | 0.47 (0.01)  | 0.48 (0.03)  | <0.001      | 0.41 (0.02)      | 0.39 (0.01)  | 0.39 (0.01)  | 0.730       |
| <b>From months 3 to 6</b>  |                                        |              |              |              |             |                  |              |              |             |
| No. of subjects            | 3 177                                  | 18 214       | 5 090        | 1 625        |             | 2 654            | 9 218        | 16 234       |             |
| Weight-for-age             |                                        |              |              |              |             |                  |              |              |             |
| Model 1*                   | 0.13 (0.01)                            | 0.15 (0.004) | 0.18 (0.01)  | 0.23 (0.01)  | <0.001      | 0.19 (0.01)      | 0.17 (0.01)  | 0.14 (0.01)  | <0.001      |
| Model 2†                   | 0.11 (0.01)                            | 0.15 (0.004) | 0.19 (0.01)  | 0.25 (0.01)  | <0.001      | 0.17 (0.01)      | 0.17 (0.01)  | 0.15 (0.01)  | 0.037       |
| Length-for-age             |                                        |              |              |              |             |                  |              |              |             |
| Model 1*                   | 0.06 (0.02)                            | 0.09 (0.01)  | 0.12 (0.01)  | 0.11 (0.02)  | 0.017       | 0.11 (0.02)      | 0.10 (0.01)  | 0.08 (0.01)  | 0.084       |
| Model 2†                   | 0.05 (0.02)                            | 0.09 (0.01)  | 0.12 (0.01)  | 0.12 (0.02)  | 0.002       | 0.11 (0.02)      | 0.10 (0.01)  | 0.08 (0.01)  | 0.210       |
| Weight-for-length          |                                        |              |              |              |             |                  |              |              |             |
| Model 1*                   | 0.29 (0.02)                            | 0.32 (0.01)  | 0.34 (0.01)  | 0.41 (0.02)  | <0.001      | 0.33 (0.02)      | 0.33 (0.01)  | 0.32 (0.01)  | 0.381       |
| Model 2†                   | 0.30 (0.02)                            | 0.32 (0.01)  | 0.33 (0.01)  | 0.40 (0.02)  | 0.003       | 0.33 (0.02)      | 0.34 (0.01)  | 0.31 (0.01)  | 0.189       |
| <b>From months 6 to 12</b> |                                        |              |              |              |             |                  |              |              |             |
| No. of subjects            | 3 046                                  | 17 354       | 4 873        | 1 557        |             | 2 559            | 8 755        | 15 516       |             |
| Weight-for-age             |                                        |              |              |              |             |                  |              |              |             |
| Model 1*                   | -0.06 (0.01)                           | -0.09 (0.01) | -0.07 (0.01) | -0.06 (0.02) | 0.027       | -0.10 (0.01)     | -0.08 (0.01) | -0.08 (0.01) | 0.162       |
| Model 2†                   | -0.08 (0.01)                           | -0.09 (0.01) | -0.06 (0.01) | -0.03 (0.02) | 0.001       | -0.12 (0.01)     | -0.08 (0.01) | -0.07 (0.01) | 0.002       |
| Length-for-age             |                                        |              |              |              |             |                  |              |              |             |
| Model 1*                   | -0.24 (0.02)                           | -0.23 (0.01) | -0.20 (0.01) | -0.16 (0.02) | 0.002       | -0.19 (0.02)     | -0.20 (0.01) | -0.23 (0.01) | 0.008       |
| Model 2†                   | -0.25 (0.02)                           | -0.23 (0.01) | -0.19 (0.01) | -0.14 (0.02) | <0.001      | -0.19 (0.02)     | -0.21 (0.01) | -0.23 (0.01) | 0.050       |
| Weight-for-length          |                                        |              |              |              |             |                  |              |              |             |
| Model 1*                   | 0.09 (0.02)                            | 0.07 (0.01)  | 0.08 (0.01)  | 0.08 (0.02)  | 0.418       | 0.01 (0.02)      | 0.06 (0.01)  | 0.09 (0.01)  | <0.001      |
| Model 2†                   | 0.10 (0.02)                            | 0.07 (0.01)  | 0.08 (0.01)  | 0.08 (0.02)  | 0.366       | 0.01 (0.02)      | 0.07 (0.01)  | 0.09 (0.01)  | <0.001      |
| <b>From months 0 to 12</b> |                                        |              |              |              |             |                  |              |              |             |
| No. of subjects            | 3 181                                  | 18 206       | 5 124        | 1 627        |             | 2 686            | 9 178        | 16 274       |             |
| Weight-for-age             |                                        |              |              |              |             |                  |              |              |             |
| Model 1*                   | 1.00 (0.02)                            | 0.93 (0.01)  | 0.88 (0.02)  | 0.73 (0.03)  | <0.001      | 1.09 (0.02)      | 1.01 (0.01)  | 0.84 (0.01)  | <0.001      |
| Model 2†                   | 0.75 (0.02)                            | 0.91 (0.01)  | 1.01 (0.01)  | 1.03 (0.02)  | <0.001      | 0.90 (0.02)      | 0.92 (0.01)  | 0.92 (0.01)  | 0.395       |
| Length-for-age             |                                        |              |              |              |             |                  |              |              |             |
| Model 1*                   | 0.80 (0.02)                            | 0.79 (0.01)  | 0.78 (0.02)  | 0.66 (0.03)  | <0.001      | 0.83 (0.02)      | 0.83 (0.01)  | 0.75 (0.01)  | <0.001      |
| Model 2†                   | 0.66 (0.02)                            | 0.78 (0.01)  | 0.85 (0.01)  | 0.84 (0.02)  | <0.001      | 0.74 (0.02)      | 0.78 (0.01)  | 0.80 (0.01)  | 0.030       |
| Weight-for-length          |                                        |              |              |              |             |                  |              |              |             |
| Model 1*                   | 0.88 (0.02)                            | 0.79 (0.01)  | 0.74 (0.02)  | 0.61 (0.03)  | <0.001      | 0.96 (0.02)      | 0.88 (0.01)  | 0.70 (0.01)  | <0.001      |
| Model 2†                   | 0.60 (0.02)                            | 0.77 (0.01)  | 0.88 (0.01)  | 0.93 (0.02)  | <0.001      | 0.75 (0.02)      | 0.78 (0.01)  | 0.80 (0.01)  | 0.216       |

studies [8,15,29]. In addition, we emphatically analyzed the growth speed of infants born to mothers with excessive or inadequate GWG in the first year of life. We firstly explored the potential effects of maternal prepregnancy BMI and GWG on the fetal growth during the first year of life, and found that maternal prepregnancy overweight/obesity and excessive GWG were associated with higher birth weight and birth length,

less weight gain and length gain in the first 3 months of life, and more weight gain and greater changes in Z scores for weight for length after 6 months before adjusted for birth variables for gestational age Z score, which was consistent with earlier findings from the PIN 3 Study [18,19]. However, after additional adjustment for birth variables for gestational age Z score, maternal prepregnancy overweight/obesity and

**Table 3 (continued).**

Data are means (SE).

\* Model 1 was adjusted for maternal age, maternal height, maternal gestational diabetes, maternal education, smoking, family income, maternal occupation, and mode of infant feeding.

† Model 2 adjusted for above variables and also birth weight for gestational age Z-score in change weight-for-age Z-score, birth length for gestational age Z-score in change length-for-age Z-score, and birth weight for birth length Z-score in change weight-for-length Z-score.

# Adjusted also for prepregnancy BMI.

§ IOM categories: Inadequate (1): <12.5 kg (pre-pregnancy BMI <18.5 kg/m<sup>2</sup>), <11.5 kg (BMI 18.5–23.9 kg/m<sup>2</sup>), <7 kg (BMI 24.0–27.9 kg/m<sup>2</sup>), and <5 kg (BMI >28 kg/m<sup>2</sup>); Adequate (1): 12.5–18 kg (BMI <18.5 kg/m<sup>2</sup>), 11.5–16 kg (BMI 18.5–23.9 kg/m<sup>2</sup>), 7–11.5 kg (BMI 24.0–27.9 kg/m<sup>2</sup>), and 5–9 kg (BMI >28 kg/m<sup>2</sup>); Excessive (1): >18 kg (BMI <18.5 kg/m<sup>2</sup>), >16 kg (BMI 18.5–23.9 kg/m<sup>2</sup>), >11.5 kg (BMI 24.0–27.9 kg/m<sup>2</sup>), and >9 kg (BMI >28 kg/m<sup>2</sup>), according to the Chinese maternal pre-pregnancy BMI classification standard and the 2009 IOM GWG recommendations.

doi: 10.1371/journal.pone.0077809.t003

excessive GWG were associated with more weight gain and length gain in the first 3 months of life. This suggested that infants born to mothers with prepregnancy overweight/obesity or excessive GWG tended to increase their weight fast from birth. However, it is not clear for the effect of birth size on later growth. Mechanisms that signal and regulate early catch-up growth in the postnatal period may influence the associations between small size at birth and risks for disease in adulthood [30]. Thus, long follow-up of our study will answer this question.

Our study found that 21.4% of children born to obese mothers were obese (weight-for-length  $\geq$  the 95th sex-specific percentile for age) at 1 year of age, and 17.0% of children born to normal weight mothers were obese. We also found that prevalence of obesity in children born to mothers with excessive GWG was higher than that in children born to mothers with adequate GWG (27.1% vs. 18.6%). These results supported previous studies. A US study reported that 36% of children (3.5 to 4.5 years) of obese mothers were obese, whereas only 7.8% of children of mothers with normal weight were obese [31]. Previous studies have found that offspring born to mothers with excessive GWG or higher prepregnancy BMI were associated with an increased risk of overweight and obesity from childhood to adulthood [32–34]. A cohort study of 10,226 participants from the Collaborative Perinatal Project (1959–1972) reported a 48% (95% CI: 1.06, 2.06) increased risk of overweight among children at 7 years of age of mothers who gained more than the weight gain recommendations compared with that among the children of mothers who met the weight gain guidelines [33]. Another study found that the risk of childhood (3 to 17 years) overweight for high GWG was 1.16 (95% CI: 1.02, 1.32), whereas for low GWG the risk of childhood overweight was not significant at 1.01 (95% CI: 0.89, 1.15) compared with children of maternal GWG at an average level [34]. We extended this relationship to children at the first year of life.

We also assessed the joint associations of maternal prepregnancy BMI and GWG with the risk of infant overweight or obesity. The present study found that infants born to mothers with prepregnancy normal weight or overweight/obesity and also with excessive GWG had a higher risk of childhood overweight/obesity at 12 months of age, however, infants born to mothers with prepregnancy overweight/obesity and also with adequate GWG did not have a higher risk of

childhood overweight/obesity at 12 months of age, compared with infants born to mothers with prepregnancy normal weight and also with adequate GWG. There are several possible mechanisms responsible for the association between maternal GWG and overweight in the offspring. A “developmental overnutrition hypothesis” could explain this relationship. The hypothesis states that high maternal glucose, free fatty acid, and amino acid concentrations result in permanent changes in appetite control, neuroendocrine functioning and/or energy metabolism in the developing fetus, thus leading to the risk of adiposity in later life[35]. In addition, mothers with excessive GWG may have a high energy diet and low levels of physical activity during their pregnancy and they may pass them on to their offspring. Thus these offspring might be more likely to gain weight in later life. This indicated that maternal excessive GWG might play a more important role in the offspring overweight, and might contribute to the overweight epidemic among infants and children.

There are several strengths in our study, including the use of GWG category instead of net weight gain, and the repeated direct measures of the growth and development of infants at birth and each 3 months until 1 year old. A limitation of our study is that we only followed infant growth to 12 months old. Thus we cannot assess the effect of maternal weight gain during pregnancy on offspring’s growth and development after 12 months old. However, the present study is an ongoing project, and we will get the children’s later growth and development information in the near future.

In summary, our study indicated that maternal prepregnancy overweight/obesity and excessive weight gain during pregnancy were associated with higher birth weight and birth length, and greater weight gain and length gain in the first year of life. Maternal excessive gestational weight gain regardless of prepregnancy BMI was associated with an increased risk of offspring overweight or obesity at 12 months of age. It is important to pay more attention to maternal influences during pregnancy to prevent the intergenerational cycle of obesity. Strategies to raise public awareness of the risks of maternal adiposity and weight gain during pregnancy on offspring future health are required.

**Table 4.** Relative risk of childhood overweight and obesity at age 12 months stratified by maternal gestational weight gain and pre-pregnancy body mass index.

|                   | IOM categories#     |                     |                     | P for trend | Total               |
|-------------------|---------------------|---------------------|---------------------|-------------|---------------------|
|                   | Inadequate          | Adequate            | Excessive           |             |                     |
| weight-for-length |                     |                     |                     |             |                     |
| Overweight*       |                     |                     |                     |             |                     |
| BMI<18.5          | 0.54<br>(0.43-0.68) | 0.64<br>(0.55-0.74) | 0.75<br>(0.64-0.89) | 0.014       | 0.63<br>(0.58-0.68) |
| 18.5≤BMI<24.0     | 0.91<br>(0.82-1.02) | 1.00                | 1.12<br>(1.05-1.20) | <0.001      | 1.00                |
| 24.0≤BMI<28.0     | 1.08<br>(0.66-1.79) | 1.00<br>(0.84-1.19) | 1.42<br>(1.31-1.53) | <0.001      | 1.30<br>(1.22-1.38) |
| BMI≥28.0          | 0.50<br>(0.14-1.78) | 1.11<br>(0.70-1.77) | 1.60<br>(1.43-1.79) | 0.054       | 1.49<br>(1.35-1.65) |
| P for trend       | <0.001              | <0.001              | <0.001              |             | <0.001              |
| Total             | 0.87<br>(0.80-0.96) | 1.00                | 1.29<br>(1.23-1.36) | <0.001      |                     |
| Obesity*          |                     |                     |                     |             |                     |
| BMI<18.5          | 0.50<br>(0.38-0.66) | 0.54<br>(0.46-0.65) | 0.75<br>(0.62-0.90) | 0.009       | 0.58<br>(0.52-0.65) |
| 18.5≤BMI<24.0     | 0.88<br>(0.77-1.00) | 1.00                | 1.11<br>(1.02-1.20) | 0.001       | 1.00                |
| 24.0≤BMI<28.0     | 1.41<br>(0.79-2.51) | 1.19<br>(0.96-1.47) | 1.43<br>(1.31-1.57) | 0.195       | 1.35<br>(1.25-1.46) |
| BMI≥28.0          | 0.37<br>(0.05-2.85) | 1.31<br>(0.76-2.26) | 1.73<br>(1.52-1.97) | 0.164       | 1.63<br>(1.45-1.84) |
| P for trend       | <0.001              | <0.001              | <0.001              |             | <0.001              |
| Total             | 0.85<br>(0.75-0.96) | 1.00                | 1.31<br>(1.23-1.40) | <0.001      |                     |

Data are OR (95% CI).

Adjusted for maternal age, maternal height, maternal gestational diabetes, maternal education, smoking, family income, maternal occupation, and mode of infant feeding.

\* Overweight was defined as weight-for-length ≥85th percentile (≥1.035 Z score); Obesity was defined as weight-for-length ≥95th percentile (≥1.645 Z score); Sex-specific weight-for-length percentiles were based on WHO growth reference (World Health Organization, 2006).

# IOM categories: Inadequate (1): <12.5 kg (pre-pregnancy BMI <18.5 kg/m<sup>2</sup>), <11.5 kg (BMI 18.5–23.9 kg/m<sup>2</sup>), <7 kg (BMI 24.0–27.9 kg/m<sup>2</sup>), and <5 kg (BMI >28 kg/m<sup>2</sup>); Adequate (1): 12.5–18 kg (BMI <18.5 kg/m<sup>2</sup>), 11.5–16 kg (BMI 18.5–23.9 kg/m<sup>2</sup>), 7–11.5 kg (BMI 24.0–27.9 kg/m<sup>2</sup>), and 5–9 kg (BMI >28 kg/m<sup>2</sup>); Excessive (1): >18 kg (BMI <18.5 kg/m<sup>2</sup>), >16 kg (BMI 18.5–23.9 kg/m<sup>2</sup>), >11.5 kg (BMI 24.0–27.9 kg/m<sup>2</sup>), and >9 kg (BMI >28 kg/m<sup>2</sup>), according to the Chinese maternal pre-pregnancy BMI classification standard and the 2009 IOM GWG recommendations.

doi: 10.1371/journal.pone.0077809.t004

## Supporting Information

**Table S1.** Comparison of Z scores for body weight, body length, and weight for length from birth to months 3, 6, 9, and 12 according to pre-pregnancy BMI and gestational weight gain categories. (DOC)

**Table S2.** Statistical Comparisons of Means and Standard Errors between prepregnancy BMI or IOM categories. (DOC)

## Author Contributions

Conceived and designed the experiments: GH GL. Performed the experiments: GL EL JG LP BL PW JL YW. Analyzed the data: NL GH. Contributed reagents/materials/analysis tools: GL. Wrote the manuscript: NL GH.

## References

- Haidar YM, Cosman BC (2011) Obesity epidemiology. *Clin Colon Rect Surg* 24: 205-210. doi:10.1055/s-0031-1295684. PubMed: 23204935.
- Zhang X, Liu E, Tian Z, Wang W, Ye T et al. (2009) High birth weight and overweight or obesity among Chinese children 3-6 years old. *Prev Med* 49: 172-178. doi:10.1016/j.ypmed.2009.07.013. PubMed: 19632265.
- Johannsson E, Arngrimsson SA, Thorsdottir I, Sveinsson T (2006) Tracking of overweight from early childhood to adolescence in cohorts



- born 1988 and 1994: overweight in a high birth weight population. *Int J Obes* 30: 1265-1271. doi:10.1038/sj.ijo.0803253.
4. Rugholm S, Baker JL, Olsen LW, Schack-Nielsen L, Bua J et al. (2005) Stability of the association between birth weight and childhood overweight during the development of the obesity epidemic. *Obes Res* 13: 2187-2194. doi:10.1038/oby.2005.271. PubMed: 16421354.
  5. Kim SY, Dietz PM, England L, Morrow B, Callaghan WM (2007) Trends in pre-pregnancy obesity in nine states, 1993-2003. *Obesity (Silver Spring)* 15: 986-993. doi:10.1038/oby.2007.621. PubMed: 17426334.
  6. Suitor CW (1991) Perspectives on nutrition during pregnancy: Part I, Weight gain; Part II, Nutrient supplements. *J Am Diet Assoc* 91: 96-98. PubMed: 1869766.
  7. Frederick IO, Williams MA, Sales AE, Martin DP, Killien M (2008) Pre-pregnancy body mass index, gestational weight gain, and other maternal characteristics in relation to infant birth weight. *Matern Child Health J* 12: 557-567. doi:10.1007/s10995-007-0276-2. PubMed: 17713848.
  8. Nohr EA, Vaeth M, Baker JL, Sørensen T, Olsen J et al. (2008) Combined associations of prepregnancy body mass index and gestational weight gain with the outcome of pregnancy. *Am J Clin Nutr* 87: 1750-1759. PubMed: 18541565.
  9. Guelinckx I, Devlieger R, Beckers K, Vansant G (2008) Maternal obesity: pregnancy complications, gestational weight gain and nutrition. *Obes Rev Off J Int Assoc Study Obes* 9: 140-150. doi:10.1111/j.1467-789X.2007.00464.x. PubMed: 18221480.
  10. Sebire NJ, Jolly M, Harris JP, Wadsworth J, Joffe M et al. (2001) Maternal obesity and pregnancy outcome: a study of 287,213 pregnancies in London. *Int J Obes Relat Metab Disord J Int Assoc Study Obes* 25: 1175-1182. doi:10.1038/sj.ijo.0801670. PubMed: 11477502.
  11. Young TK, Woodmansee B (2002) Factors that are associated with cesarean delivery in a large private practice: the importance of prepregnancy body mass index and weight gain. *Am J Obstet Gynecol* 187: 312-320; discussion: 312-320. doi:10.1038/oby.2007.585. PubMed: 17372328.
  12. Li C, Goran MI, Kaur H, Nollen N, Ahluwalia JS (2007) Developmental trajectories of overweight during childhood: role of early life factors. *Obesity (Silver Spring)* 15: 760-771. doi:10.1038/oby.2007.585. PubMed: 17372328.
  13. Institute of Medicine (2009) *Weight Gain During Pregnancy: Reexamining the Guidelines*. Washington (DC): National Academies Press (US)
  14. Yang YD, Yang HX (2012) Investigation into the clinical suitability of Institute of Medicine 2009 guidelines regarding weight gain during pregnancy for women with full term singleton fetus in China. *Zhonghua Fu Chan Ke Za Zhi* 47: 646-650. PubMed: 23141284.
  15. Liu Y, Dai W, Dai X, Li Z (2012) Prepregnancy body mass index and gestational weight gain with the outcome of pregnancy: a 13-year study of 292,568 cases in China. *Arch Gynecol Obstet* 286: 905-911. doi:10.1007/s00404-012-2403-6. PubMed: 22695822.
  16. Min J, Li J, Li Z, Wang Y (2012) Impacts of infancy rapid weight gain on 5-year childhood overweight development vary by age and sex in China. *Pediatric obesity* 7: 365-373
  17. Baird J, Fisher D, Lucas P, Kleijnen J, Roberts H et al. (2005) Being big or growing fast: systematic review of size and growth in infancy and later obesity. *Bmj* 331: 929. doi:10.1136/bmj.38586.411273.E0. PubMed: 16227306.
  18. Deierlein AL, Siega-Riz AM, Herring AH, Adair LS, Daniels JL (2012) Gestational weight gain and predicted changes in offspring anthropometrics between early infancy and 3 years. *Pediatric obesity* 7: 134-142
  19. Deierlein AL, Siega-Riz AM, Adair LS, Herring AH (2011) Effects of prepregnancy body mass index and gestational weight gain on infant anthropometric outcomes. *J Pediatr* 158: 221-226. doi:10.1016/j.jpeds.2010.08.008. PubMed: 20863516.
  20. Tianjin Women's and Children's Health Center (2010). p. 2010. Tianjin Women and Children Health Care Report. Tianjin Women's and Children's Health Center, Tianjin Women's and Children's Health Center.
  21. Working Group on Obesity in China (2004) Guidelines for Prevention and Control of Overweight and Obesity in Chinese Adults. *Acta Nutrimenta Sin* 26: 1-4.
  22. Wang Y, Mi J, Shan XY, Wang QJ, Ge KY (2007) Is China facing an obesity epidemic and the consequences? The trends in obesity and chronic disease in China. *Int J Obes* 31: 177-188. doi:10.1038/sj.ijo.0803354.
  23. Zhou BF (2002) Predictive values of body mass index and waist circumference for risk factors of certain related diseases in Chinese adults--study on optimal cut-off points of body mass index and waist circumference in Chinese adults. *Biomed Environ Sci* 15: 83-96. PubMed: 12046553.
  24. Chen CM (2008) Overview of obesity in Mainland China. *Obes Rev Off J Int Assoc Study Obes* 9 Suppl 1: 14-21. doi:10.1111/j.1467-789X.2008.00487.x. PubMed: 18307694.
  25. Mamun AA, Callaway LK, O'Callaghan MJ, Williams GM, Najman JM et al. (2011) Associations of maternal pre-pregnancy obesity and excess pregnancy weight gains with adverse pregnancy outcomes and length of hospital stay. *BMC Pregnancy Childbirth* 11: 62. doi:10.1186/1471-2393-11-62. PubMed: 21892967.
  26. World Health Organization (2006) The WHO Child Growth Standards. WHO website. Available: <http://www.who.int/childgrowth/standards/en/>. Accessed 2013 September 16.
  27. Barlow SE (2007) Expert committee recommendations regarding the prevention, assessment, and treatment of child and adolescent overweight and obesity: summary report. *Pediatrics* 120 Suppl 4: S164-S192. doi:10.1542/peds.2007-2329C. PubMed: 18055651.
  28. WHO/IDF consultation (2006) Definition and diagnosis of diabetes mellitus and intermediate hyperglycemia: report of a WHO/IDF consultation. Geneva: World Health Organization: WHO/IDF consultation
  29. Stotland NE, Cheng YW, Hopkins LM, Caughey AB (2006) Gestational weight gain and adverse neonatal outcome among term infants. *Obstet Gynecol* 108: 635-643. doi:10.1097/01.AOG.0000228960.16678.bd. PubMed: 16946225.
  30. Ong KK, Ahmed ML, Emmett PM, Preece MA, Dunger DB (2000) Association between postnatal catch-up growth and obesity in childhood: prospective cohort study. *BMJ* 320: 967-971. doi:10.1136/bmj.320.7240.967. PubMed: 10753147.
  31. Olson CM, Demment MM, Carling SJ, Strawderman MS (2010) Associations Between Mothers' and Their Children's Weights at 4 Years of Age. *Childhood obesity* 6: 201-207
  32. Stuebe AM, Forman MR, Michels KB (2009) Maternal-recalled gestational weight gain, pre-pregnancy body mass index, and obesity in the daughter. *Int J Obes* 33: 743-752. doi:10.1038/ijo.2009.101. PubMed: 19528964.
  33. Wrotniak BH, Shults J, Butts S, Stettler N (2008) Gestational weight gain and risk of overweight in the offspring at age 7 y in a multicenter, multiethnic cohort study. *Am J Clin Nutr* 87: 1818-1824. PubMed: 18541573.
  34. von Kries R, Ensenauer R, Beyerlein A, Amann-Gassner U, Hauner H et al. (2011) Gestational weight gain and overweight in children: Results from the cross-sectional German KiGGS study. *Int J Pediatr Obes* 6: 45-52. doi:10.3109/17477161003792564. PubMed: 20441556.
  35. Drake AJ, Reynolds RM (2010) Impact of maternal obesity on offspring obesity and cardiometabolic disease risk. *Reproduction* 140: 387-398. doi:10.1530/REP-10-0077. PubMed: 20562299.
